# Supplementary material
Source: PubMed Central journal article supplement (PMC8492018)

**Appendix**  
**Effects of a Community-Level Intervention on Alcohol-Related**  
**Motor Vehicle Crashes in California Cities: A Randomized Trial**  
**Saltz et al.**

**Appendix Table 1.** Community-Level Interventions

| <b>Drinking and driving enforcement</b>                        |                                                                                                                                                         |
|----------------------------------------------------------------|---------------------------------------------------------------------------------------------------------------------------------------------------------|
| Roadside DUI checkpoints                                       | Drivers are selected at random along major arteries and screened, and breath tested where indicated                                                     |
| DUI saturation patrols                                         | Dedicated team(s) patrol streets looking for DUI violators                                                                                              |
| <b>Retail serving practices (onsite and off-site licenses)</b> |                                                                                                                                                         |
| Responsible beverage service training                          | Gives clerks and servers training on serving laws and some skills to identify and refuse service to minors and intoxicated patrons                      |
| Responsible beverage service enforcement                       | To enforce state laws prohibiting service to minors and/or intoxicated patrons                                                                          |
| <b>Reduce social availability including to youth</b>           |                                                                                                                                                         |
| Nuisance party patrols                                         | Citation given to host(s) of large, noisy parties. Aim is to reduce number of such parties or for host to keep them small and quiet                     |
| Social host ordinances                                         | Citation given to owner of property where underage youth are drinking                                                                                   |
| <b>Reduce retail availability to youth</b>                     |                                                                                                                                                         |
| Minor decoy operations (compliance checks)                     | Store clerk or bar server is cited if he or she sells alcohol to an underage youth working with law enforcement. Licensee is also penalized             |
| Purchase surveys                                               | Young-looking but legal-age people attempt to buy alcohol to see if they are asked for ID. If yes, a small reward is given, if no, a reminder is given. |

**Appendix**  
**Effects of a Community-Level Intervention on Alcohol-Related**  
**Motor Vehicle Crashes in California Cities: A Randomized Trial**  
**Saltz et al.**

Appendix Figure 1. Logic model for prevention of underage drinking.

## Underage Drinking: Basic Research

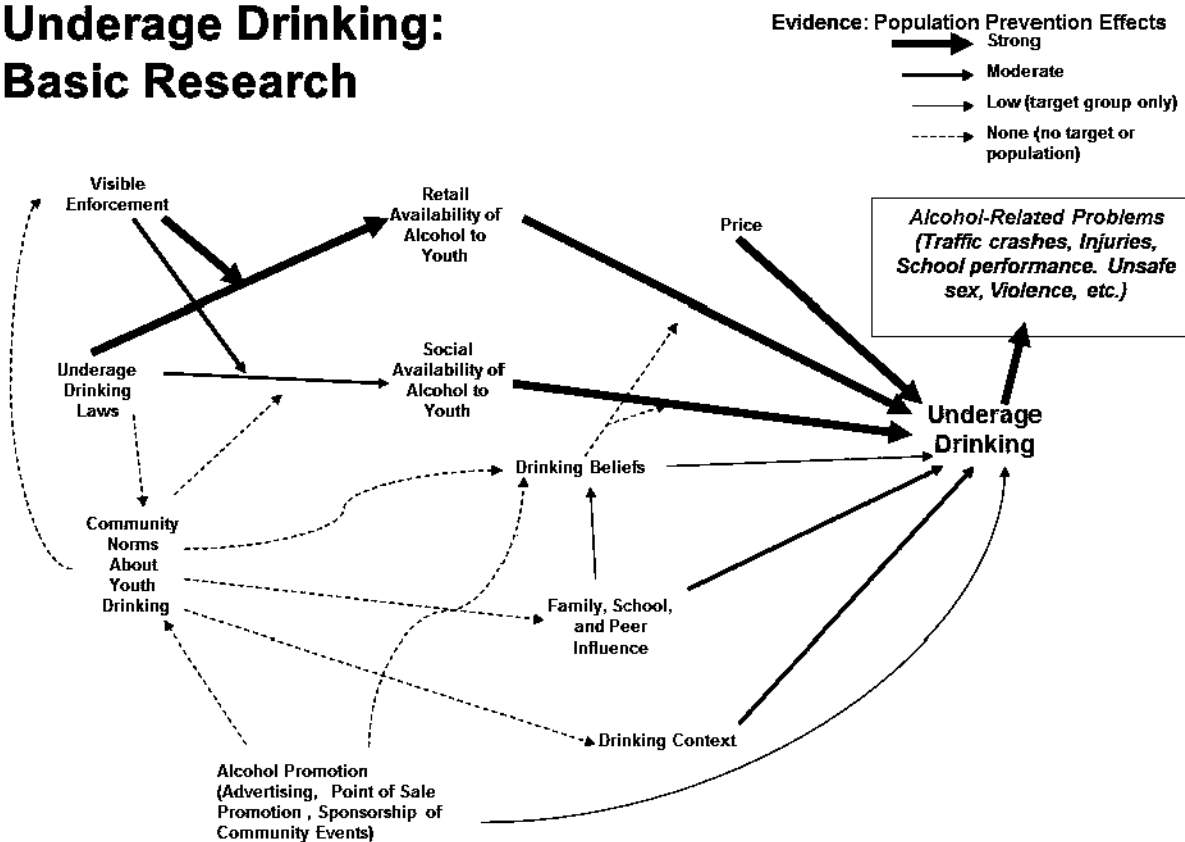

**Appendix**  
**Effects of a Community-Level Intervention on Alcohol-Related**  
**Motor Vehicle Crashes in California Cities: A Randomized Trial**  
**Saltz et al.**

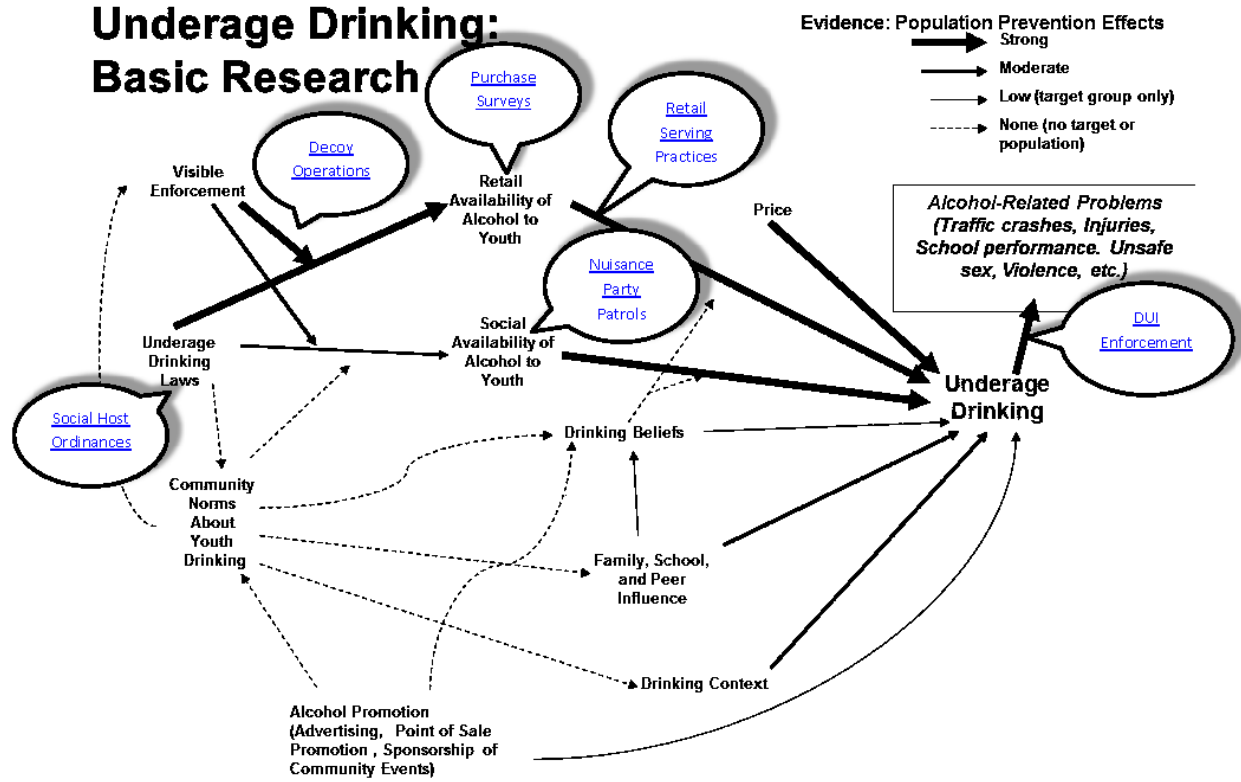

**Appendix**  
**Effects of a Community-Level Intervention on Alcohol-Related**  
**Motor Vehicle Crashes in California Cities: A Randomized Trial**  
**Saltz et al.**

**Appendix Figure 2.** Logic model for prevention of alcohol-impaired driving.

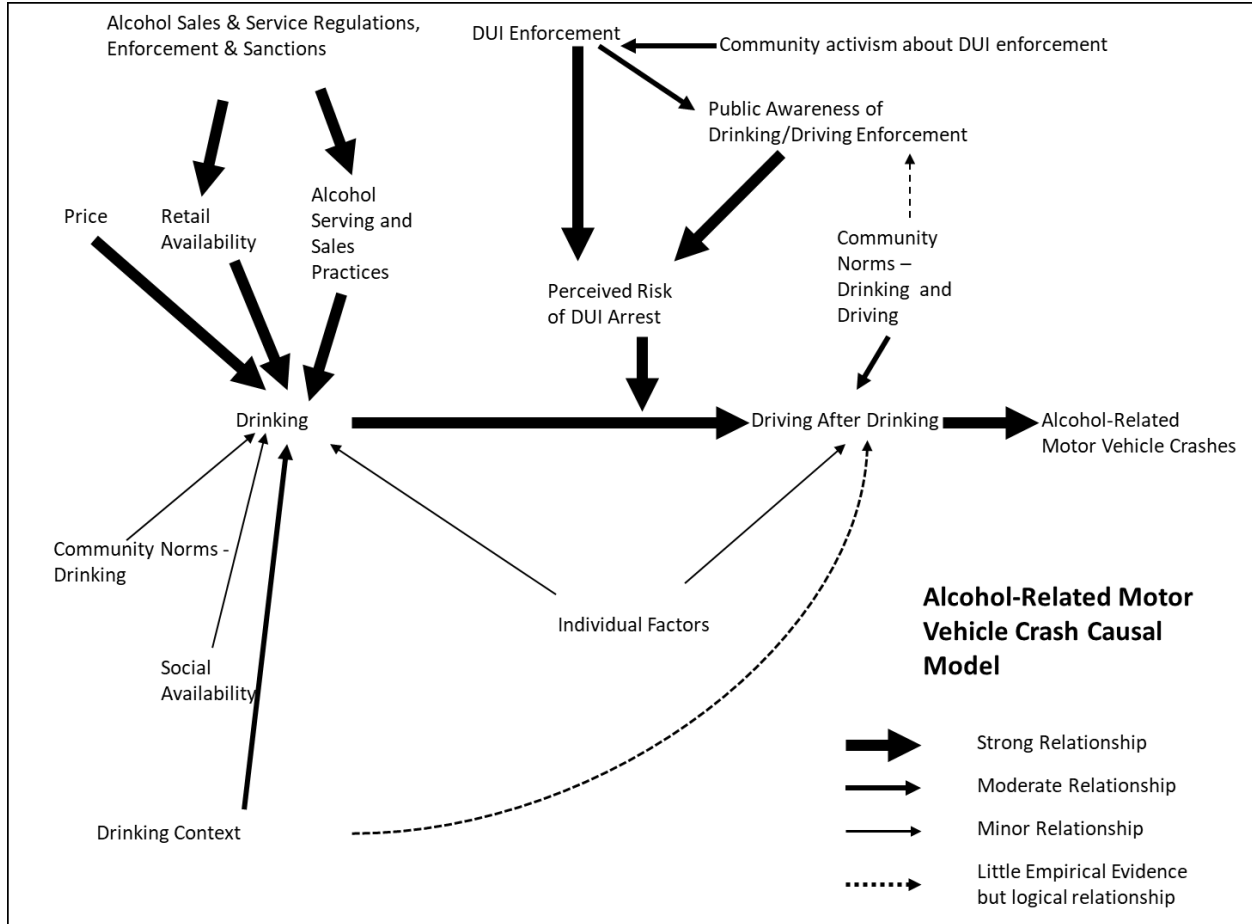

**Appendix**  
**Effects of a Community-Level Intervention on Alcohol-Related**  
**Motor Vehicle Crashes in California Cities: A Randomized Trial**  
**Saltz et al.**

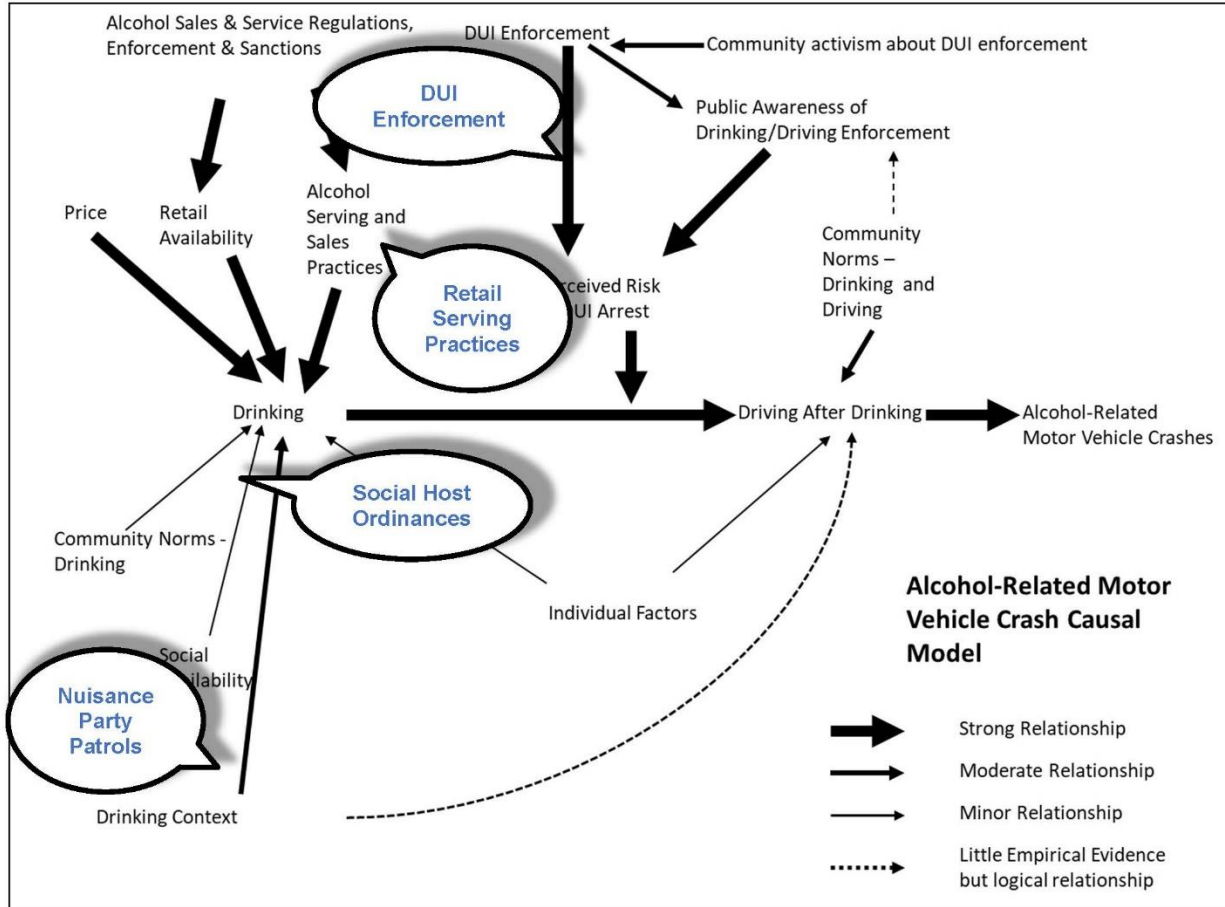

Supplement: NIHMS1736182-supplement-1.pdf [file NIHMS1736182-supplement-1.pdf]
